# Supplementary material for: Inhibitory effect of organic acids on human neutrophil myeloperoxidase’s peroxidation, chlorination, and nitration activities
Source: publisher site journal article supplement (doi:10.1515/tjb-2022-0260), 2023-07-20

# Inhibitory effect of organic acids on human neutrophil myeloperoxidase's peroxidation, chlorination, and nitration activities

## Supplementary Data

Legend for all plots:

Left: Inhibition Plot, The dotted lines indicated the Plateau (parallel to the x-axis) and maximum effective inhibitor concentration (parallel to the y-axis).

Right: Logarithmic transform of left plot, the dotted line indicated the  $\text{LogIC}_{50}$

### A. Graphics for Effect of organic acids on peroxidation activity of MPO

#### 1. Effect of Citric acid

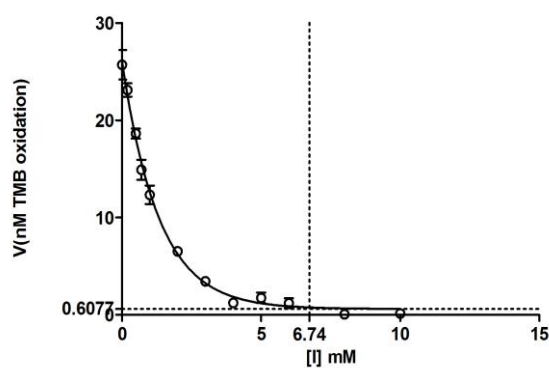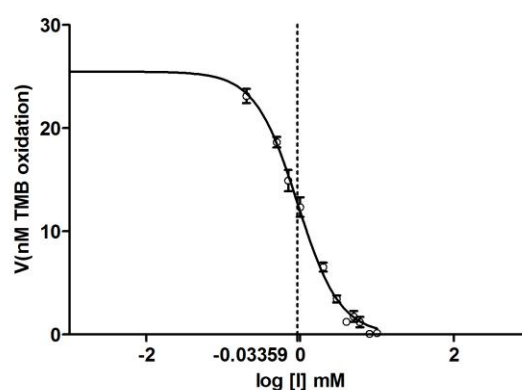

#### 2. Effect of Fumaric acid

3.

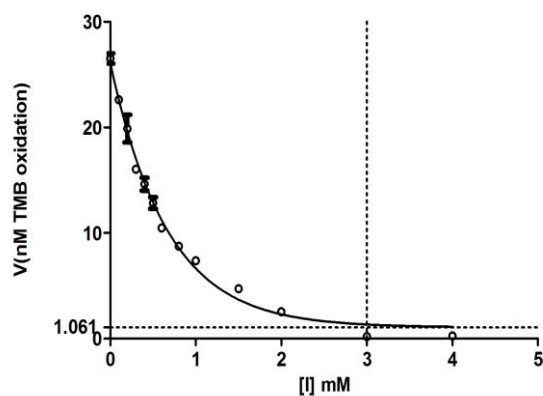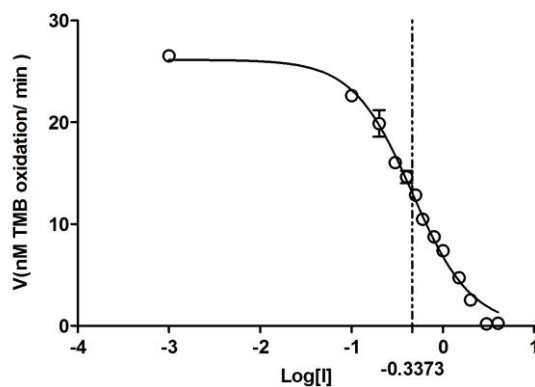

#### 4. Effect of Malic acid

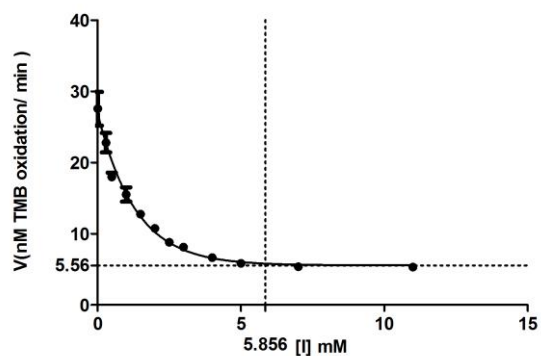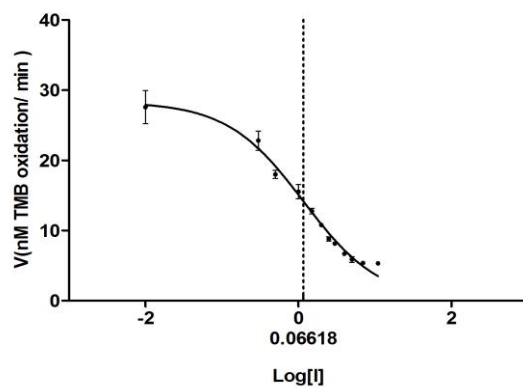

#### 5. Effect of Oxalic acid

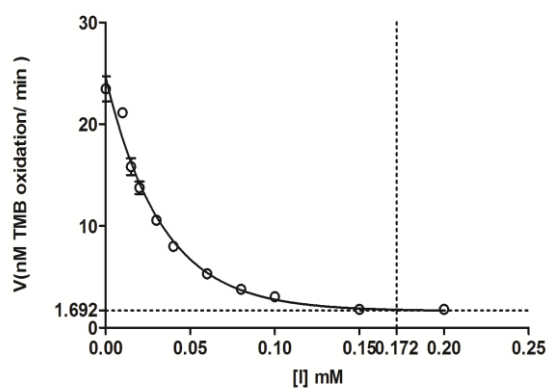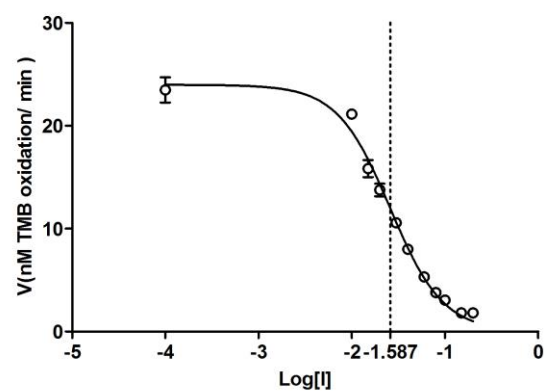

#### 6. Effect of Succinic acid

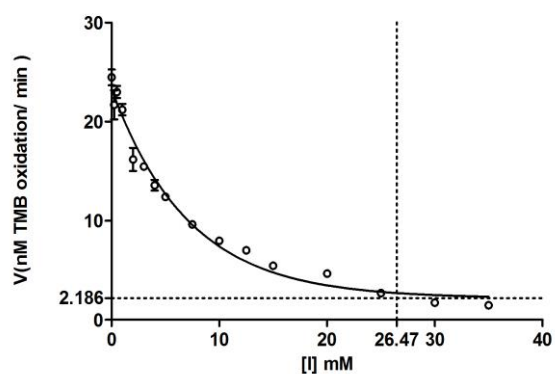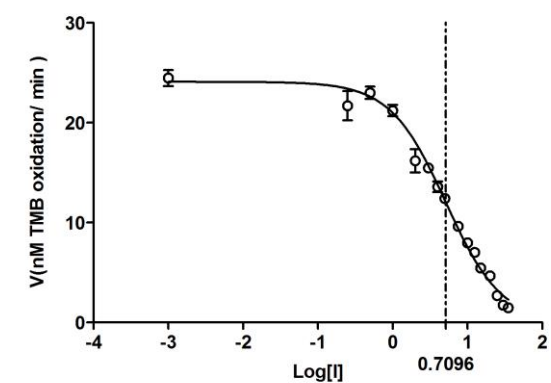

## 7. Effect of Tartaric acid

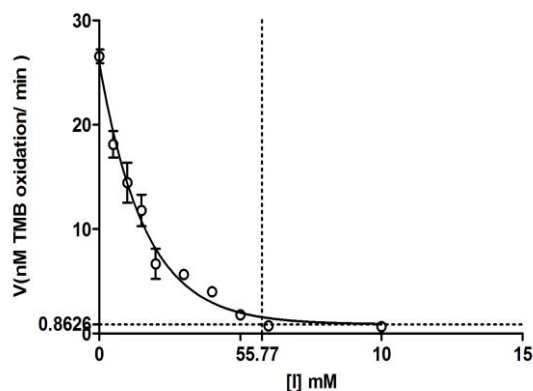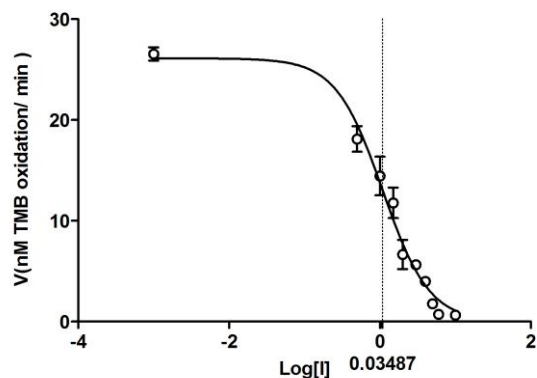

## 8. Effect of Trans aconitic acid

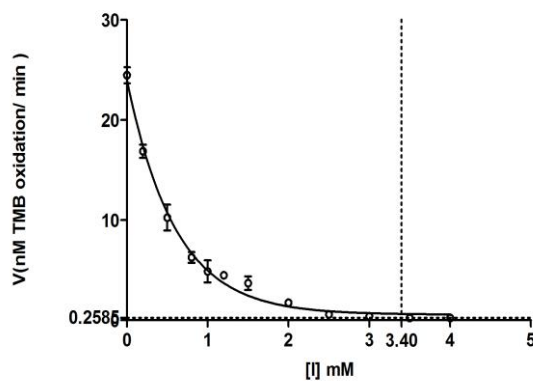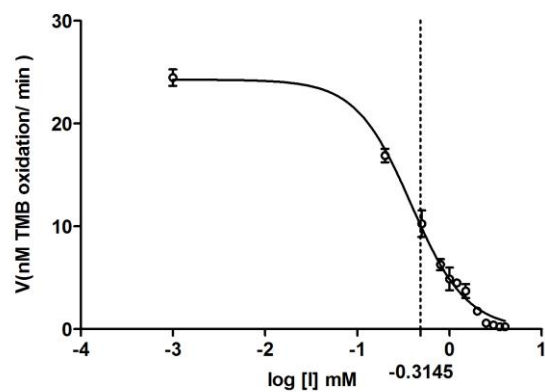

## B. Graphics for Effect of organic acids on Chlorination activity of MPO

### 1. Effect of Citric acid

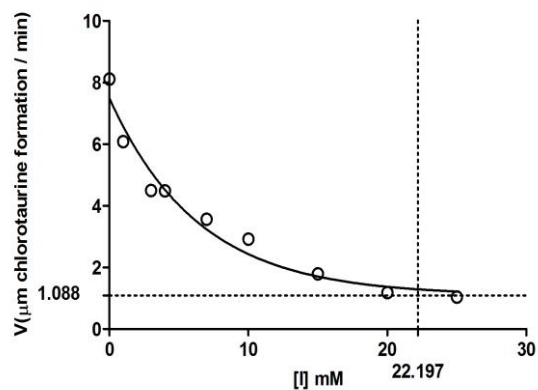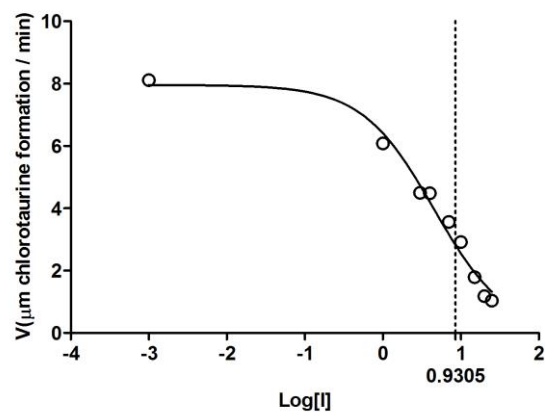

## 2. Effect of Fumaric acid

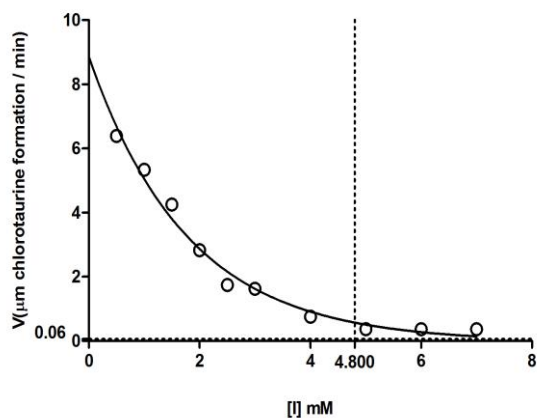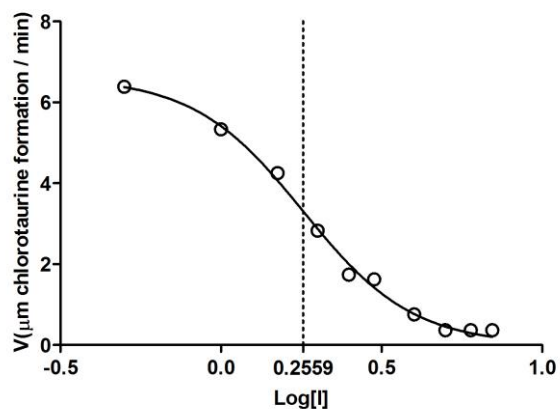

## 3. Effect of Malic acid

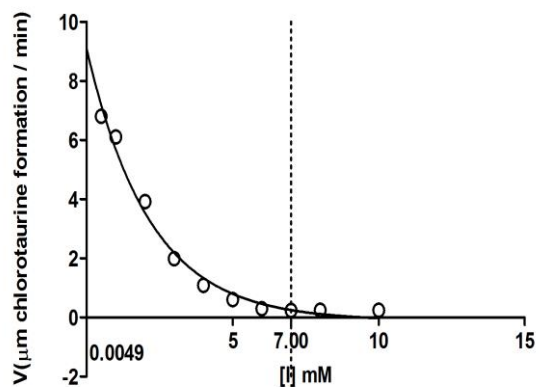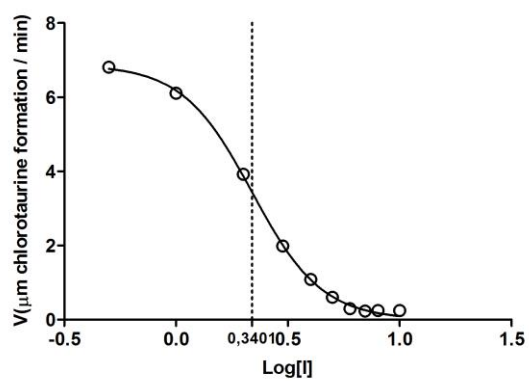

## 4. Effect of Oxalic acid

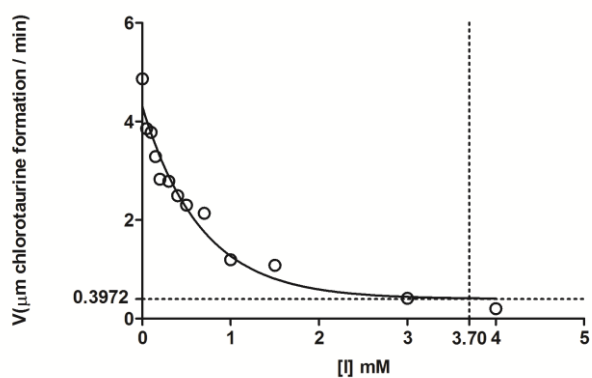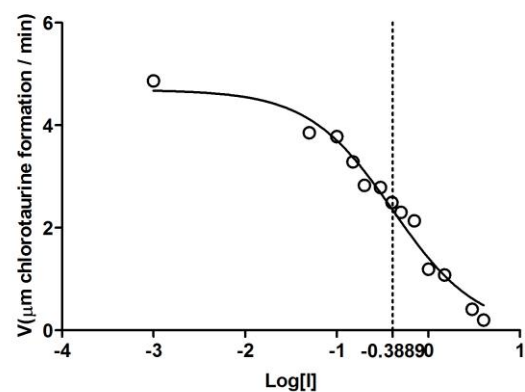

## 5. Effect of Succinic acid

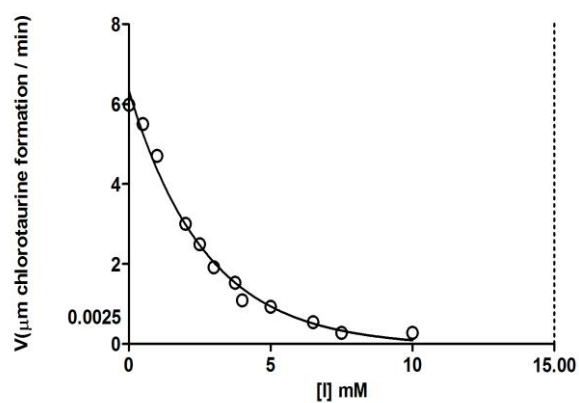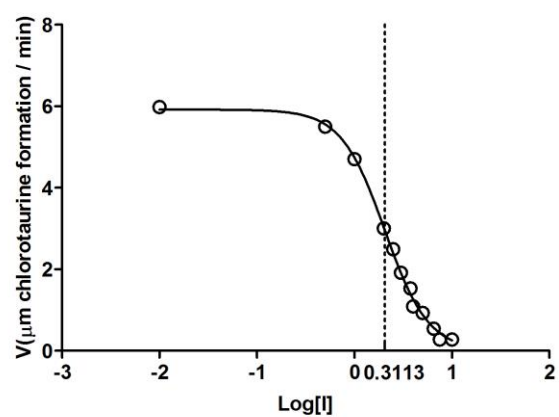

## 6. Effect of Tartaric acid

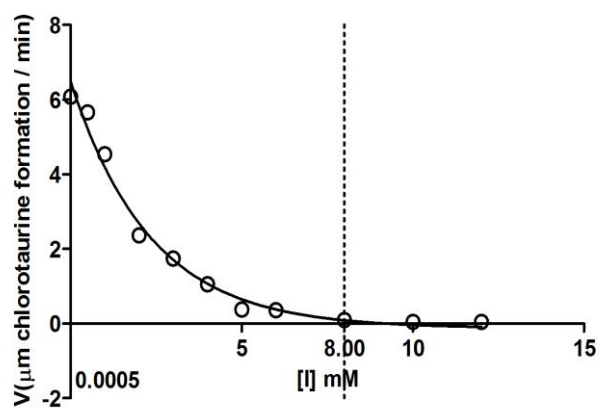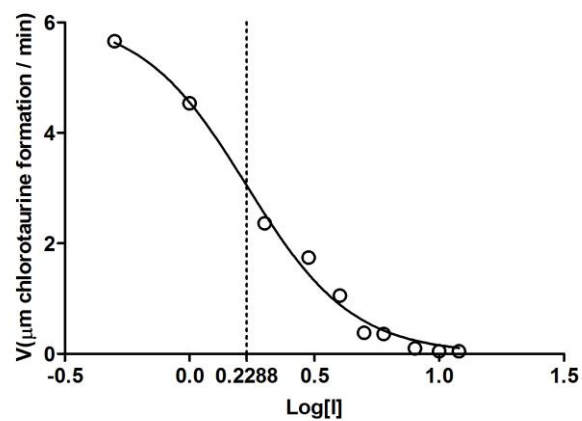

## 7. Effect of Trans-Aconitic acid

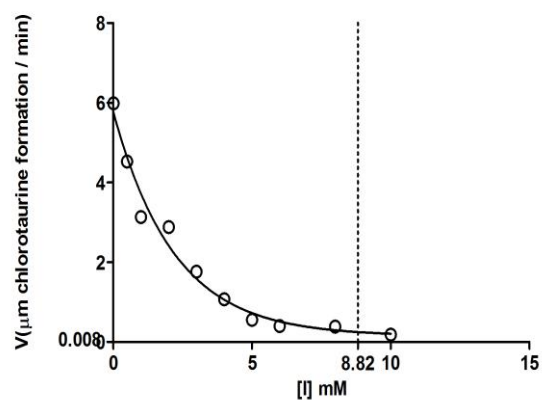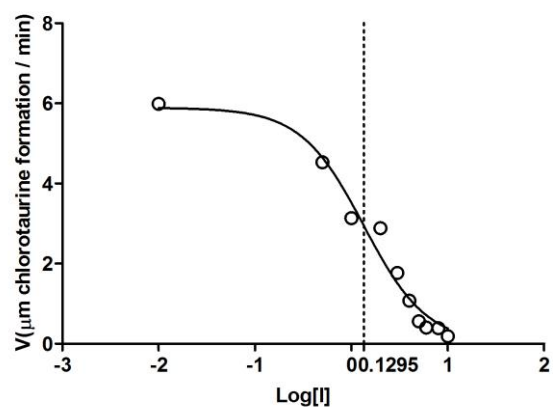

### C. Graphics for Effect of organic acids on Nitration activity of MPO

#### 1. Effect of Citric acid

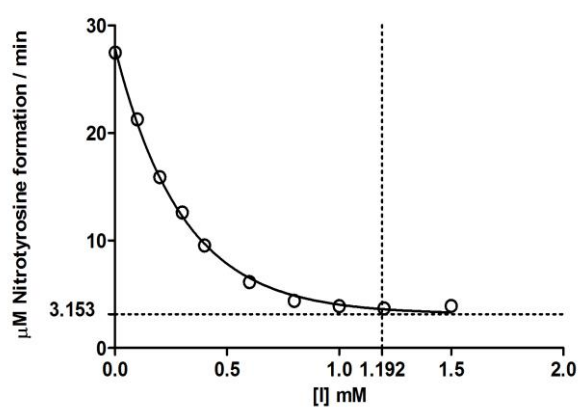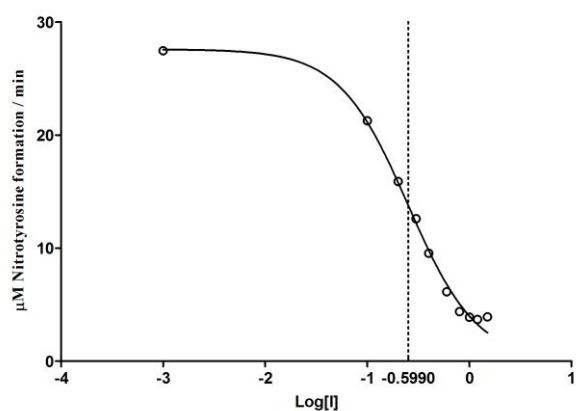

#### 2. Effect of Fumaric acid

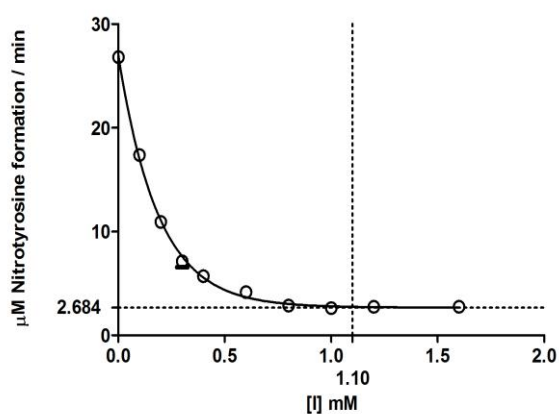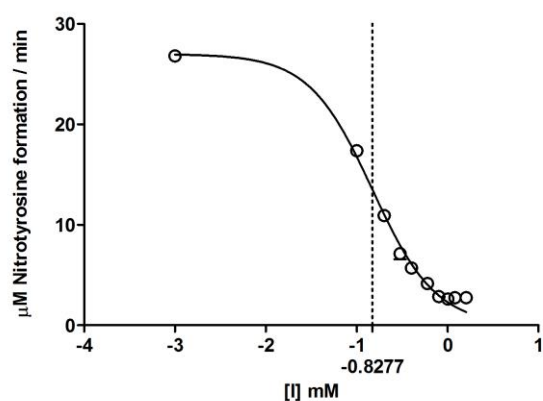

#### 3. Effect of Malic acid

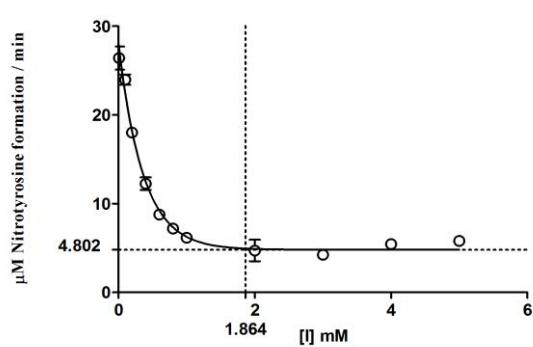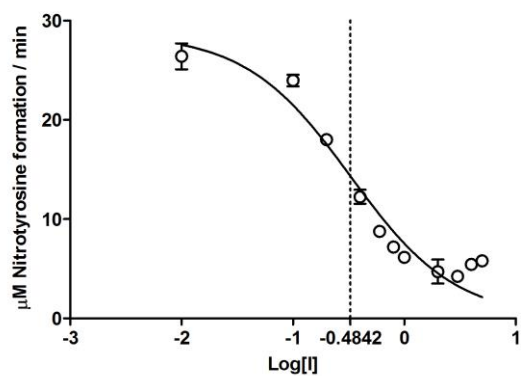

#### 4. Effect of Oxalic acid

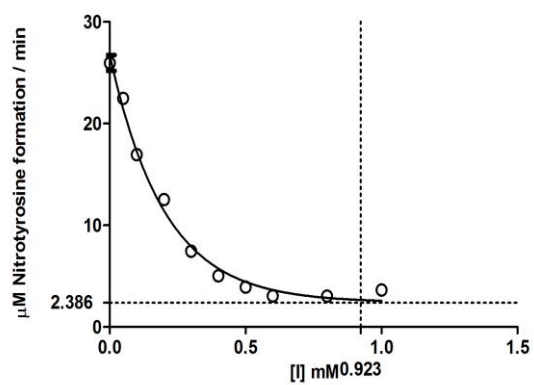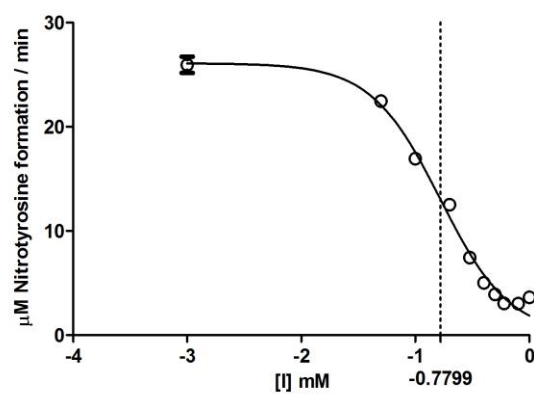

#### 5. Effect of Succinic acid

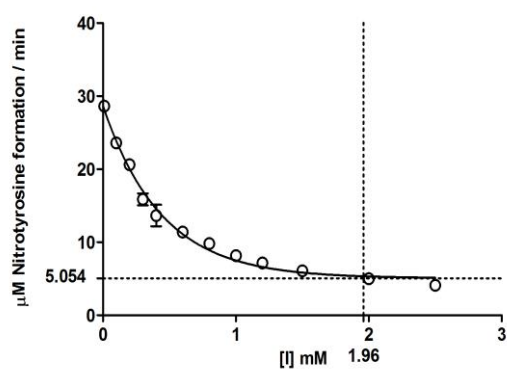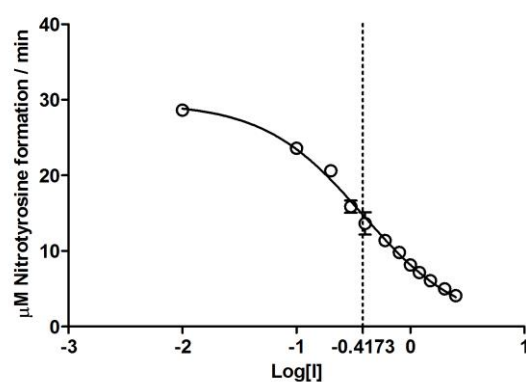

#### 6. Effect of Tartaric acid

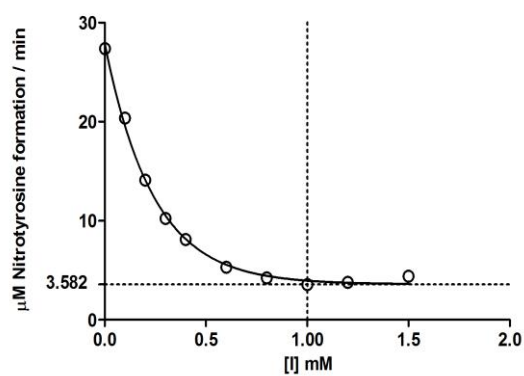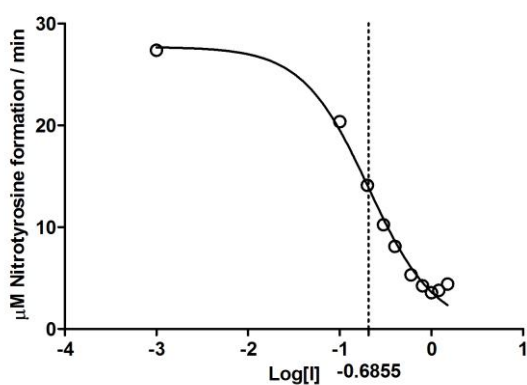

## 7. Effect of Trans aconitic acid

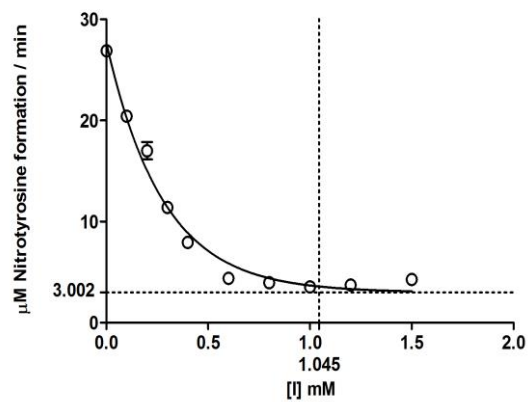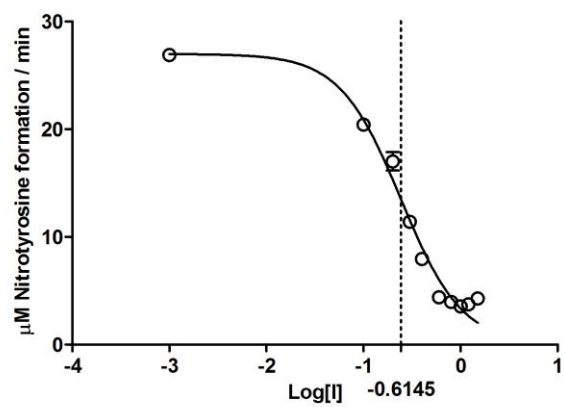

Supplement: Supplementary file 1 [file j_tjb-2022-0260_suppl_001.pdf]
